# Supplementary material for: Protein engineering of the aldoxime dehydratase from Bacillus sp. OxB-1 based on a rational sequence alignment approach
Source: PubMed Central journal article supplement (PMC8275659; doi:10.1038/s41598-021-92749-0), 2021-07-12
Supplement: 41598_2021_92749_MOESM1_ESM.pdf [file 41598_2021_92749_MOESM1_ESM.pdf]

## Supplementary Information

### **Protein engineering of the aldoxime dehydratase from *Bacillus* sp. OxB-1 based on a rational sequence alignment approach**

Keiko Oike<sup>1</sup>, Jens Sproß<sup>1</sup>, Daisuke Matsui<sup>2</sup>, Yasuhisa Asano<sup>2</sup>, Harald Gröger<sup>1,\*</sup>

<sup>1</sup>Chair of Industrial Organic Chemistry and Biotechnology, Faculty of Chemistry, Bielefeld University,  
Universitätsstraße 25, Bielefeld 33615, Germany

<sup>2</sup>Biotechnology Research Center and Department of Biotechnology, Toyama Prefectural University,  
5180 Kurokawa, Imizu, Toyama, 939-0398, Japan

## **1. General information**

All enzymes and cells were handled, unless otherwise stated at 4 °C. The variants (OxdB-M1 to OxdB-M20 and Oxd-D1 to Oxd-D3 refer to the single point mutations introduced in the main paper (e.g. Table 1)

## **2. Sequence of OxdB**

*Gene (359 AS, 41.2 kDa)*

**ATG**AAAAATATGCCGAAAATCACAAATCCACAAGCGAATGCCTGGACTGCCGAATTTCTCCTGA  
AATGAGCTATGTAGTATTTGCGCAGATTGGGATTCAAAGCAAGTCTTTGGATCACGCAGCGGAAC  
ATTTGGGAATGATGAAAAAGAGTTTCGATTTGCGGACAGGCCCCAAACATGTGGATCGAGCCTTG  
CATCAAGGAGCCGATGGATACCAAGATTCCATCTTTTTAGCCTACTGGGATGAGCCTGAAACATT  
TAAATCATGGGTTGCGGATCCTGAAGTACAAAAGTGGTGGTCCGGTAAAAAATCGATGAAAATA  
GTCCAATCGGGTATTGGAGTGAGGTAACGACCATTCCGATTGATCACTTTGAGACTCTTCATTCC  
GGAGAAAATTACGATAATGGGGTTTTCACACTTTGTACCGATCAAGCATAACAGAAGTCCATGAATAT  
TGGGGAGCAATGCGCGACCCGATGCCGGTGTCTGCCAGTAGTGATTTGGAAAGCCCCCTTGGC  
CTTCAATTACCGGAACCCATTGTCCGGGAGTCTTTCCGAAAACGGCTAAAAGTCACGGCGCCGG  
ATAATATTTGCTTGATTGGAACCGCTCAAATTTGGTCTAAATGTGGTAGCGGGGAAAGGGAAACG  
TATATAGGACTAGTGAACCGACCCCTCAAAAAGCGAATACGTTTCTTCGTGAAAATGCTAGTGAA  
ACAGGCTGTATTAGTTCAAATTAGTCTATGAACAGACCCATGACGGCGAAATAGTAGATAAATCA  
TGTGTCATCGGATATTATCTCTCCATGGGGCATCTTGAACGCTGGACGCATGATCATCCAACACA  
TAAAGCGATCTACGGAACCTTTTATGAGATGTTGAAAAGGCATGATTTTAAGACCGAACTTGCTTT  
ATGGCACGAGGTTTCGGTGCTTCAATCAAAGATATCGAGCTTATCTATGTCAACTGCCATCCGA  
GTACTGGATTTCTTCCATTCTTTGAAGTGACAGAAATTCAGAGCCTTTACTGAAAAGCCCTAGCG  
TCAGGATCCAGCTCGAGCACCACCACCACCACCTGAGATCCGGCTGCTAACAAAGCCCCGAAA  
GAAGTTTTTT

### *Amino acids*

MKNMPENHNPQANAWTAEFPPEMS YVVFAQIGIQSKSLDHAAEHLGMMKKSFDLRTGPKHVDRALH  
QGADGYQDSIFLAYWDEPETFKSWVADPEVQKWWSGKKIDENSPIGYWSEVTTIPIDHFETLHSGEN  
YDNGVSHFVPIKHTEVHEYWGAMRDRMPVSASSDLESPLGLQLPEPIVRESFGKRLKV TAPDNICLIR  
TAQNWSKCGSGERETYIGLVEPTLIKANTFLRENASETGCISSKLVYEQTHDGEIVDKSCVIGYYLSMG  
HLERWTHDHPTHKAIYGTFYEMLKRHDFKTELALWHEVSVLQSKDIELIYVNCHPSTGFLPFFEVEIQ  
EPLLKSPSVRIQ**LEHHHHH**

## 2. Result sheet of INTMSAlign\_HiSol

The program INTMSAlign\_HiSol was applied to the sequence of OxdB according to literature known methods as mentioned in the main work.[1]

| Position | Amino acid (OxdB) | Conservation [%] |     |      |      |      |      |      |      |     |      |      |      |      |      |      |      |      |      |     |     | HiSol score |        |
|----------|-------------------|------------------|-----|------|------|------|------|------|------|-----|------|------|------|------|------|------|------|------|------|-----|-----|-------------|--------|
|          |                   | A                | C   | D    | E    | F    | G    | H    | I    | K   | L    | M    | N    | P    | Q    | R    | S    | T    | V    | W   | Y   |             | none   |
| 319      | I                 | 1.7              | 0.1 | 2.4  | 90.0 | 0.2  | 0.6  | 0.2  | 0    | 0.4 | 0.1  | 0.8  | 0    | 0.1  | 0.3  | 0.5  | 0.3  | 0.2  | 0.4  | 0.1 | 0.1 | 1.7         | 2.656  |
| 226      | I                 | 0.6              | 1.3 | 3.9  | 2.9  | 0.2  | 0.4  | 5.3  | 3.5  | 7.9 | 1.1  | 6.2  | 1.1  | 0.1  | 26.5 | 30.0 | 1.4  | 2.3  | 4.3  | 0   | 0   | 1.1         | 2.411  |
| 220      | L                 | 4.3              | 0   | 20.7 | 39.7 | 0    | 0.6  | 0.9  | 0.2  | 5.8 | 0    | 0.6  | 8.7  | 0.2  | 3.0  | 1.6  | 2.5  | 9.9  | 0.3  | 0   | 0   | 1.2         | 2.281  |
| 149      | V                 | 0.1              | 0   | 0.6  | 65.6 | 1.1  | 0.1  | 0.9  | 0.4  | 7   | 7.9  | 0.5  | 1.8  | 0.1  | 1.1  | 1.4  | 0    | 4.1  | 1.8  | 0.3 | 3.0 | 2.3         | 2.278  |
| 105      | I                 | 12.7             | 0.3 | 8.2  | 6.9  | 0.3  | 2.3  | 0.6  | 0    | 2.5 | 2.5  | 0.1  | 0.7  | 7.4  | 2.3  | 32.6 | 2.1  | 3.1  | 1.3  | 0   | 0   | 14.3        | 2.252  |
| 267      | L                 | 6.7              | 1.0 | 14.9 | 2.0  | 0    | 1.2  | 3.4  | 0.6  | 9.5 | 4.9  | 1.6  | 0.8  | 0.2  | 3.3  | 40.0 | 2.8  | 5.8  | 0.5  | 0   | 0.2 | 0.7         | 2.226  |
| 316      | I                 | 14.0             | 1.0 | 0.4  | 0.1  | 0.4  | 0.2  | 1.0  | 4.3  | 0   | 1.5  | 1.7  | 0.6  | 0.8  | 67.9 | 0.3  | 0.4  | 1.1  | 2.2  | 0   | 0   | 2.2         | 2.175  |
| 180      | I                 | 13.9             | 0.4 | 12.3 | 5.2  | 1.2  | 6.1  | 0.8  | 0.3  | 2.2 | 2.0  | 0.5  | 3.4  | 5.1  | 2.9  | 6.1  | 12.4 | 7.3  | 3.6  | 0   | 0.3 | 14.1        | 1.890  |
| 65       | L                 | 5.9              | 1.6 | 1.9  | 2.6  | 2.9  | 1.2  | 24.2 | 1.0  | 0.4 | 0    | 0.9  | 0.5  | 0.2  | 12   | 14.1 | 11.2 | 3.6  | 6.5  | 0.5 | 5.6 | 3.5         | 1.880  |
| 262      | V                 | 3.8              | 0.3 | 7.7  | 2.3  | 0.1  | 43.8 | 0    | 0.1  | 0.6 | 0.1  | 0.1  | 23.4 | 0    | 4.7  | 0.1  | 2.3  | 2.0  | 7.1  | 0   | 0.4 | 1.2         | 1.852  |
| 317      | E                 | 2.8              | 0.3 | 5.3  | 1.4  | 11.9 | 0.5  | 4.5  | 3.4  | 0.2 | 17.8 | 1.0  | 0.6  | 0.7  | 2.9  | 7.2  | 7.6  | 5.1  | 13.7 | 2.1 | 9.2 | 2.1         | -1.452 |
| 190      | K                 | 0.7              | 0.7 | 0.1  | 0.7  | 2.3  | 1.0  | 0.7  | 8.0  | 0   | 4.7  | 1.6  | 0.1  | 0.1  | 1.1  | 34.5 | 1.5  | 5.3  | 34.2 | 0.4 | 0.3 | 2.0         | -1.471 |
| 135      | D                 | 2.9              | 0.1 | 0.8  | 1.0  | 8.7  | 4.9  | 0.2  | 1.0  | 1.9 | 35.0 | 2.1  | 2.0  | 25.3 | 1.9  | 3.8  | 1.2  | 0.8  | 1.5  | 0.3 | 0.7 | 4.0         | -1.496 |
| 67       | Q                 | 3.6              | 0.1 | 5.0  | 4.9  | 0.3  | 0.5  | 1.4  | 8.9  | 1.1 | 8.1  | 0.4  | 1.6  | 1.5  | 0    | 1.7  | 0.7  | 32.2 | 24.2 | 0   | 0.5 | 3.5         | -1.533 |
| 49       | K                 | 15.0             | 0.3 | 4.5  | 3.2  | 1.5  | 1.7  | 1.6  | 5.0  | 0.9 | 6.9  | 1.1  | 1.8  | 0.7  | 4.2  | 9.7  | 3.7  | 7.1  | 24.2 | 1.1 | 0.1 | 5.6         | -1.582 |
| 63       | R                 | 2.4              | 0.2 | 0.3  | 2.2  | 8.5  | 0.3  | 3.2  | 5.1  | 0.3 | 34.6 | 2.2  | 0.3  | 1.1  | 1.3  | 15.8 | 6.3  | 4.0  | 5.2  | 2.6 | 0.3 | 4.0         | -1.882 |
| 296      | H                 | 0.8              | 0.1 | 0.2  | 0.6  | 13.5 | 5.3  | 0    | 0.7  | 0.4 | 56.7 | 4.3  | 0.4  | 0.1  | 1.2  | 0.3  | 0.4  | 0.5  | 1.5  | 0.7 | 7.4 | 5.0         | -1.943 |
| 229      | N                 | 0.5              | 0   | 0    | 0    | 0.1  | 0    | 0.1  | 1.9  | 0   | 10.0 | 80.1 | 0    | 0    | 0    | 0    | 0    | 0.3  | 6.1  | 0   | 0   | 0.8         | -1.974 |
| 250      | Q                 | 1.0              | 0.7 | 0.7  | 3.3  | 3.9  | 0.5  | 0.4  | 29.2 | 0.5 | 24.0 | 1.8  | 0.2  | 2.0  | 2.0  | 2.7  | 1.4  | 3.1  | 19.5 | 0   | 0.4 | 2.7         | -2.153 |
| 283      | K                 | 2.7              | 0   | 0.3  | 0.7  | 0.3  | 0.1  | 1.5  | 2.4  | 1.9 | 57.8 | 0.3  | 0    | 0    | 0.5  | 1.3  | 0.3  | 0.2  | 28.8 | 0   | 0   | 1.0         | -2.485 |

**Table S1.** Output sheet of INTMSAlign\_HiSol applied to the sequence of OxdB according to the formula given in chapter 9.2. Conservation (similarity) of all amino acid residues in the gene family for the positions, which exhibited the highest absolute HiSol. The suggested mutations are marked in yellow.

### 3. Utilised primers

The following primers were utilized for introduction of the point mutations into the sequence of OxdB according to a PCR method displayed in the main paper.

| Entry | Mutation | Sequence (5' to 3')                                                                                               |
|-------|----------|-------------------------------------------------------------------------------------------------------------------|
| 1     | I319E    | Forward: GATATCGAGCTT <b>GAA</b> TATGTCAACTGCCATC<br>Reverse: GATGGCAGTTGACATAT <b>TTC</b> AAGCTCGATATC           |
| 2     | I226Q    | Forward: GACCCTC <b>CAAAA</b> AGCGAATACGTTTC<br>Reverse: GAAACGTATTCGCTTT <b>TTG</b> GAGGGTC                      |
| 3     | L220E    | Forward: CGTATATAGG <b>GAA</b> GTGGAACCGACCCTC<br>Reverse: GAGGGTCGGTCCACT <b>TTC</b> TCCTATATACG                 |
| 4     | V149E    | Forward: GTACCGATCAAGCATAACAGA <b>GAG</b> CATGAATATTG<br>Reverse: CAATATTCATG <b>GCTC</b> TTCTGTATGCTTGATCGGTAC   |
| 5     | I105R    | Forward: GTCGGGTAAAA <b>AGAG</b> GATGAAAATAGTCCAATC<br>Reverse: GATTGGACTATTTTCATC <b>TCT</b> TTTTTTTACCCGAC      |
| 6     | L267R    | Forward: GTGTCATCGGATATTAT <b>CGC</b> TCCATGG<br>Reverse: CCATGG <b>GCG</b> ATAATATCCGATGACAC                     |
| 7     | I316Q    | Forward: CAATCCAAAGAT <b>CAG</b> GAGCTTATCTATGTCAAC<br>Reverse: GTTGACATAGATAAGCTC <b>CTG</b> ATCTTTGGATTG        |
| 8     | I180A    | Forward: CTTCAATTACCGGAACCC <b>GCT</b> GTCC<br>Reverse: GGAC <b>AGC</b> GGGTCCGGTAATTGAAG                         |
| 9     | L65H     | Forward: CATGTGGATCGAGCC <b>CAC</b> CATCAAG<br>Reverse: CTTGATG <b>GTG</b> GGCTCGATCCACATG                        |
| 10    | V262G    | Forward: CATGT <b>GGC</b> ATCGGATATTATCTCTCCATG<br>Reverse: CATGGAGAGATAATATCCGAT <b>GCC</b> ACATG                |
| 11    | E317L    | Forward: CCAAAGATATC <b>CTG</b> CTTATCTATGTCAACTGCC<br>Reverse: GGCAGTTGACATAGATAAG <b>CAG</b> GATATCTTTGG        |
| 12    | K190R    | Forward: CTTTCGGAAAACGGCTA <b>AGAG</b> TCACG<br>Reverse: CGTGACT <b>TCT</b> TAGCCGTTTTCCGAAAG                     |
| 13    | D135L    | Forward: GAGAAAATTAC <b>CTA</b> AATGGGGTTTTCACACTTTGTAC<br>Reverse: GTACAAAGTGTGAAACCCCATTT <b>AG</b> GTAATTTTCTC |
| 14    | Q67T     | Forward: CCTTGCAT <b>ACAG</b> GAGCCGATGGATAC<br>Reverse: GTATCCATCGGCTCCT <b>TGT</b> ATGCAAGG                     |
| 15    | K49V     | Forward: CATTTGGGAATGATG <b>GTA</b> AAGAGTTTCGATTTG<br>Reverse: CAAATCGAAACTCTTT <b>TACC</b> CATCATTCCCAAATG      |
| 16    | R63L     | Forward: CAAACATGTGGAT <b>CTA</b> GCCTTGCATCAAG<br>Reverse: CTTGATGCAAGGCT <b>TAG</b> ATCCACATGTTTG               |
| 17    | H296L    | Forward: GTTGAAAAGG <b>CTT</b> GATTTTAAGACCGAACTTG<br>Reverse: CAAGTTCGGTCTTAAAATC <b>AAG</b> CCTTTTCAAC          |
| 18    | N229M    | Forward: CTCATAAAAGCG <b>ATG</b> ACGTTTCTTCGTG<br>Reverse: CACGAAGAAACGT <b>CAT</b> CGCTTTTATGAG                  |
| 19    | Q250I    | Forward: CTATGAA <b>ATC</b> ACCCATGACGGCGAAATAG<br>Reverse: CTATTT <b>CG</b> CGTCATGGGT <b>GAT</b> TTTCATAG       |
| 20    | K283L    | Forward: GATCATCCAACACAT <b>TTA</b> GCGATCTACGG<br>Reverse: CCGTAGATCGCT <b>TAA</b> ATGTGTTGGATGATC               |

**Table S2.** Primers used for the introduction of single mutations in the sequence of OxdB *via* PCR with wild-type or mutated pET22b-OxdB(C)6His as template DNA.

#### 4. Experiments with whole-cell catalysts

Expression and purification were performed according to a slightly modified literature known protocol.[2] A preculture of *E. coli* BL21(DE3) harbouring pET22b-OxdB(C)6His or its variants was inoculated from a LB-agar-plate and grown for 13 hours in test-tubes containing 5.0 mL LB-medium and 50  $\mu\text{g}\cdot\text{mL}^{-1}$  Carbenicillin at 37 °C at 160 rpm rotary shaking. Subsequently, a main culture of 70 mL Terrific-broth medium containing 50  $\mu\text{g}\cdot\text{mL}^{-1}$  Carbenicillin in a 100 mL Erlenmeyer flask (for whole-cell activity screening: 70 mL medium in 100 mL flask) was inoculated with 700 mL of the preculture. The culture was incubated for approximately 6 hours at 30 °C and 150 rpm rotary shaking and induced with IPTG (1.0 mM final concentration). After induction, the incubation conditions were changed to 26 °C and 120 rpm rotary shaking. After 21 hours, the cells were harvested by centrifugation (4,000  $\times g$ , 4 °C, 15 min) and washed twice with potassium phosphate buffer (50 mM, pH 7.0). After repeated centrifugation (4,000  $\times g$ , 4 °C, 15 min), the cells were resuspended in 5.0 vol% of the initial medium volume KPB (50 mM, pH 7.0), overlaid with argon and stored at 4 °C as a resting cells suspension.

The activity assay was carried out according to a literature known method. [3] The standard assay solution contained 387.5  $\mu\text{L}$  of KPB (50 mM, pH 7.0), 12.5  $\mu\text{L}$  of a solution of Z-PAOx in DMSO (200 mM, final concentration: 5.0 mM) and 100  $\mu\text{L}$  of diluted resting cells suspension (2.0  $\mu\text{L}$  resting cells suspension and 98  $\mu\text{L}$  water) in total volume of 500  $\mu\text{L}$ . The reaction was carried out for 1 minute at 30 °C with shaking at 800 rpm and terminated by the addition of 400  $\mu\text{L}$  of acetonitrile and 100  $\mu\text{L}$  of 0.1 M HCl. After centrifugation (21,500  $\times g$ , 15 min, 4 °C), the supernatant was transferred into HPLC vials and the conversion of the reaction was measured with RP-HPLC in comparison to a calibration curve. Measurements were conducted on a Macherey-Nagel Nucleodur C18 HTec column at 40 °C with acetonitrile/water (30:70 v,v) as mobile phase and UV detection at 210 nm.

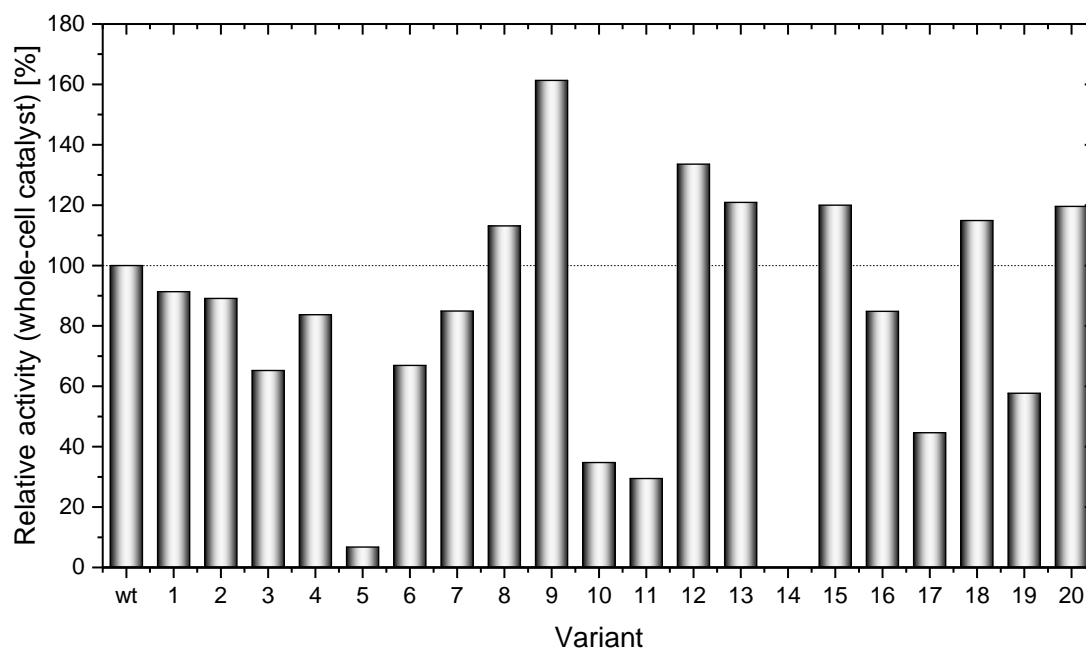

**Figure S1.** Relative activities of the whole-cell catalysts expressing OxdB variants compared to the wild-type enzyme (0.820 U  $\text{mg}_{\text{bww}}^{-1}$ ).

The OxdB-M14 variant was constructed again after the whole-cell catalyst assay and was active in purified form. A test with whole-cell was not carried out again.

## 5. Electrophoresis of purified variants OxdB variants

Sodium dodecylsulfate polyacrylamide gelelectrophoresis was carried out according to the method by Laemmli. [4] 2.5  $\mu$ g of the purified protein was loaded on the gels.

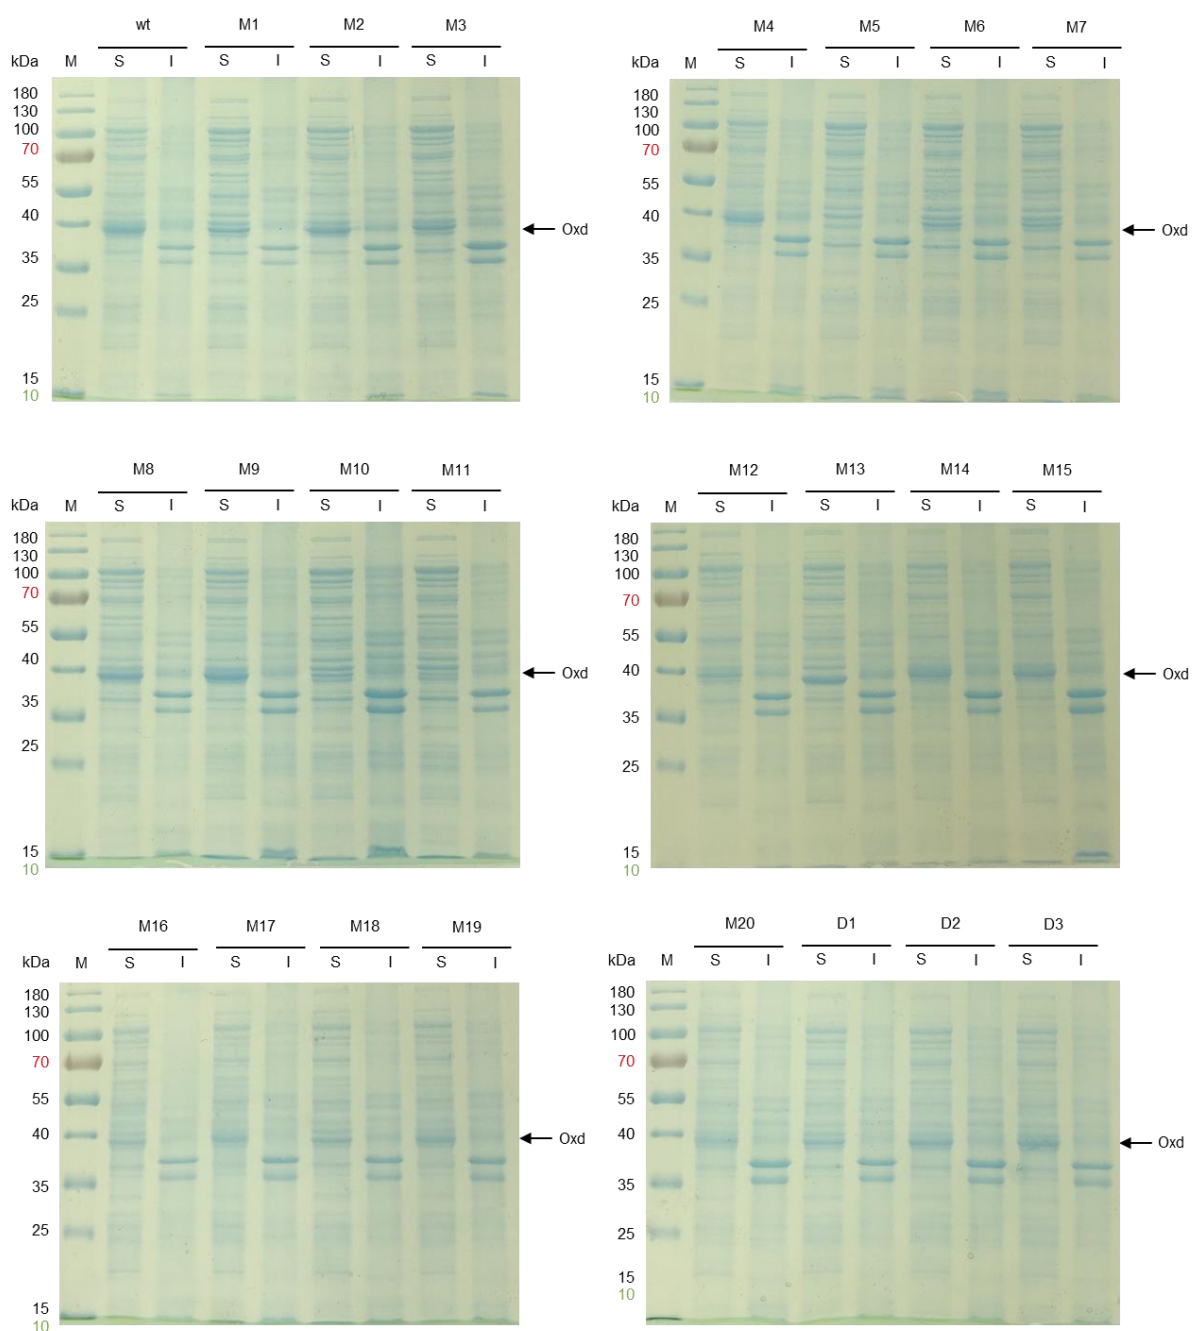

**Figure S2.** SDS-PAGE analysis of the soluble (S) and insoluble fraction (I) of the expression of wild-type OxdB and the constructed variants.

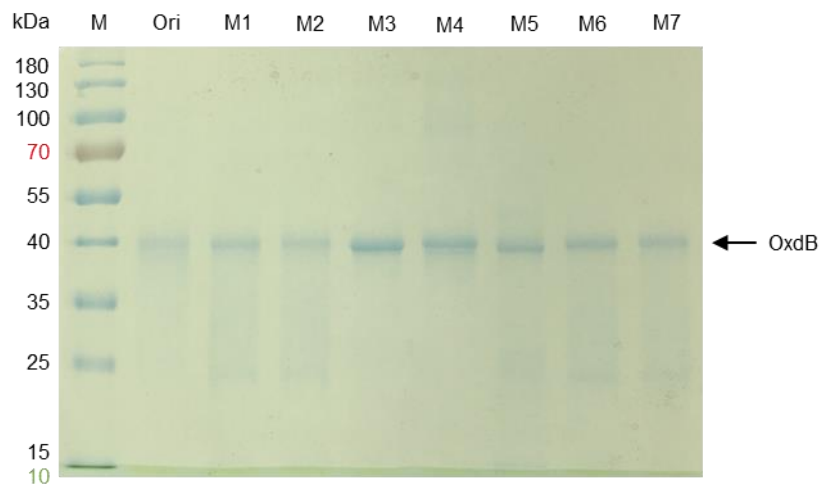

**Figure S3.** SDS-PAGE of OxdB mutants purified *via* TALON® affinity chromatography. The lanes refer to the corresponding variants (see Table S1).

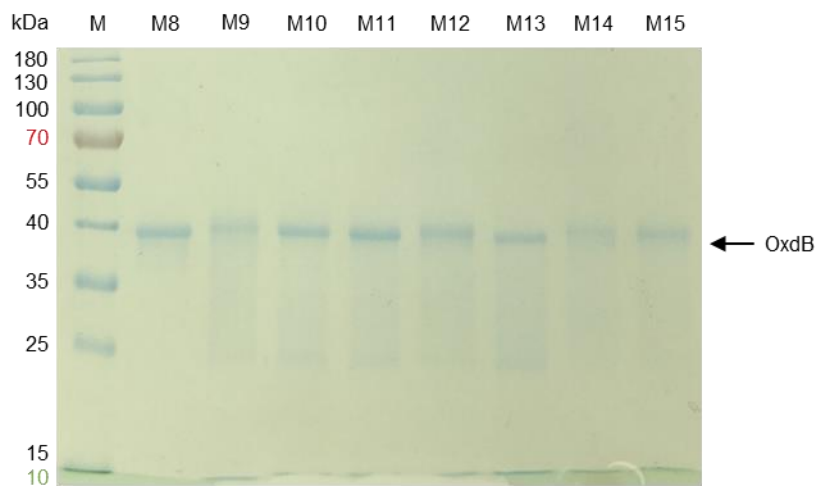

**Figure S4.** SDS-PAGE of OxdB mutants purified *via* TALON® affinity chromatography. The lanes refer to the corresponding variants (see Table S1).

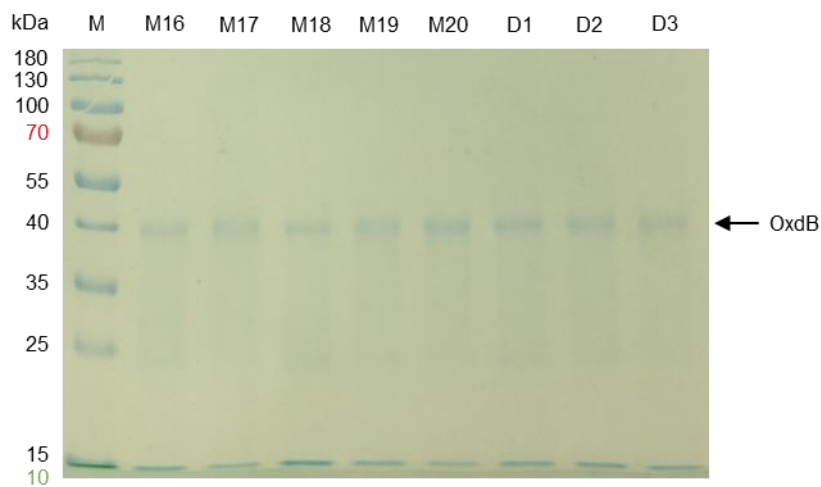

**Figure S5.** SDS-PAGE of OxdB mutants purified *via* TALON® affinity chromatography. The lanes refer to the corresponding variants (see Table S1).



## 5. Sequence alignment

```
OxdA 1 MESAIDTHLKCPRTLSRRVPEEYQPPFFPMWVARADEQLQQVVMGYLGVQYRGEAQREAAAL 60
OxdB 1 MKNMPENHNPQANAWTAEFPPEMSYVVFQAQIGIQSKSLDHAAEHLGMMKKSFDLRTGPKH 60
OxdRE 1 MESAIGEHLQCPRTLRRVEDTYTPPFPMWVGRADDALQQVVMGYLGVQFRDEDQRPAAAL 60

OxdA 61 QAMRHIVSSFSLPDGPQTHDLTHHTDSSGFDNLMVVGYWKDPAAHCRWLRSAEVNDWWTS 120
OxdB 61 VDRALHQGADGYQDSIFLAWDEPETFKSWVADPEVQKWSGKKIDENSPIGYWSEVTTI 120
OxdRE 61 QAMRDIVAGFDLPDGAHHDLTHHIDNGQYENLIVVGYWKDVSSQHRWSTSTPIASWWES 120

OxdA 121 QDRLGEGLGYFREISAPRAEQFETLYAFQDNLPGVGAVMDSTSGEIEEHGYWGSMRDRFP 180
OxdB 121 PIDHFETLHSGENYDNGVSHFVPIKHTEVHEYWGAMRDRMPVSASSDLESPLGLQLPEPI 180
OxdRE 121 EDRLSDGLGGFREIVAPRAEQFETLYAFQEDLPGVGAVMDGISGEINEHGYWGSMRERFP 180

OxdA 181 ISQTDWMKPTNELQVVAGDPAKGGRRVIMGHDNIALIRSGQDWADAEAEERSLYLDEILP 240
OxdB 181 VRESFGKRLKVTAPDNICLIRTAQNWSKCGSGERETYIGLVEPTLIKANTFLRENASETG 240
OxdRE 181 ISQTDWMQASGELRVIAGDPAVGGRRVVRGHDNIALIRSGQDWADAEAEERSLYLDEILP 240

OxdA 241 TLQDGMDFLRDNGQPLGCYSNRFVRNIDLDGNFLDVSYNIGHWRSLEKLERWASHPTHL 300
OxdB 241 CISSKLVYEQTHDGEIVDKSCVIGYYLSMGHLERWTHDHPTHKAIYGTFYEMLKRHDFKT 300
OxdRE 241 TLQSGMDFLRDNGPAVGCYSNRFVRNIDIDGNFLDLSYNIGHWASLDQLERWSESHPTHL 300

OxdA 301 RIFVTFFRVAAGLKKLRLYHEVSVSDAKSQVFEYINCHPHTGMLRDAVWAPT 352
OxdB 301 ELALWHEVSVLQSKDIELIYVNCHPSTGFLPFFFEVTEIQEPLLKSPSVRIQ 351
OxdRE 301 RIFTTFFRVAAGLSKLRLYHEVSVFDAADQLYEYINCHPGTGMLRDAVTIAEH 353
```

Figure S6. Alignment of the sequences of OxdA, OxdB and OxdRE.

## 6. Mass spectrometry of OxdB variants

Static nanoESI measurements of the purified OxdB (variants) were carried out under denaturing and native conditions according to methods described in the main paper.

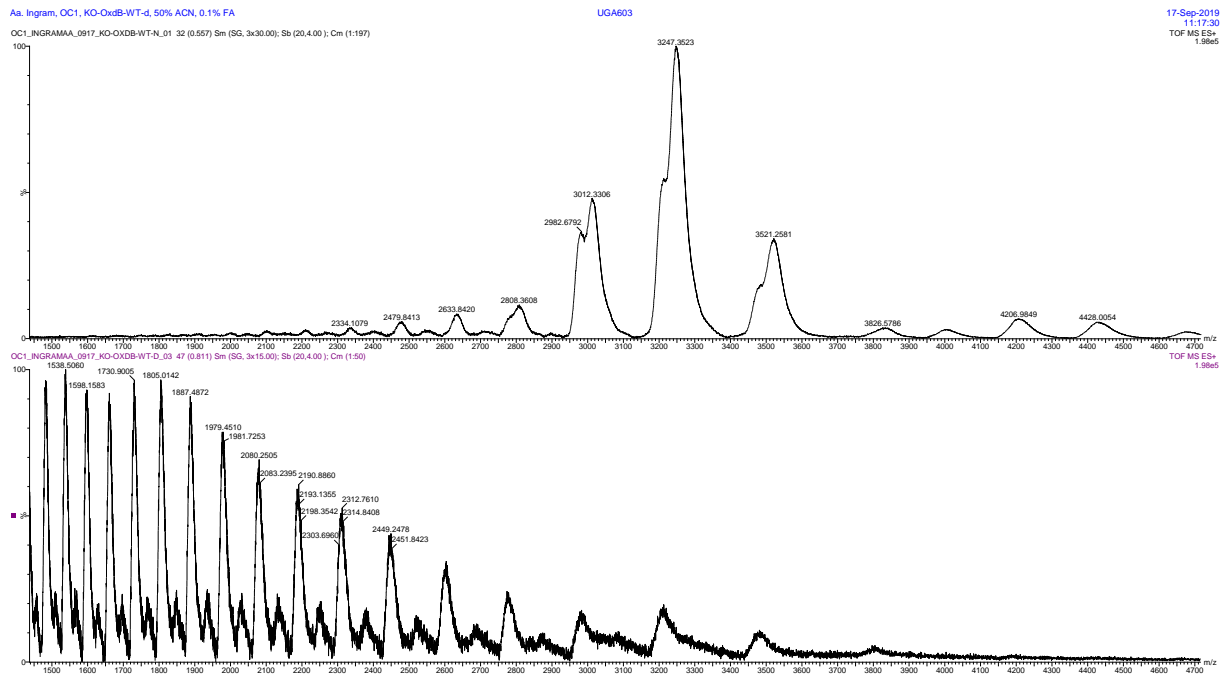

Figure S7. ESI-mass spectrum of native (upper) and denatured (lower) purified wild-type-OxdB.

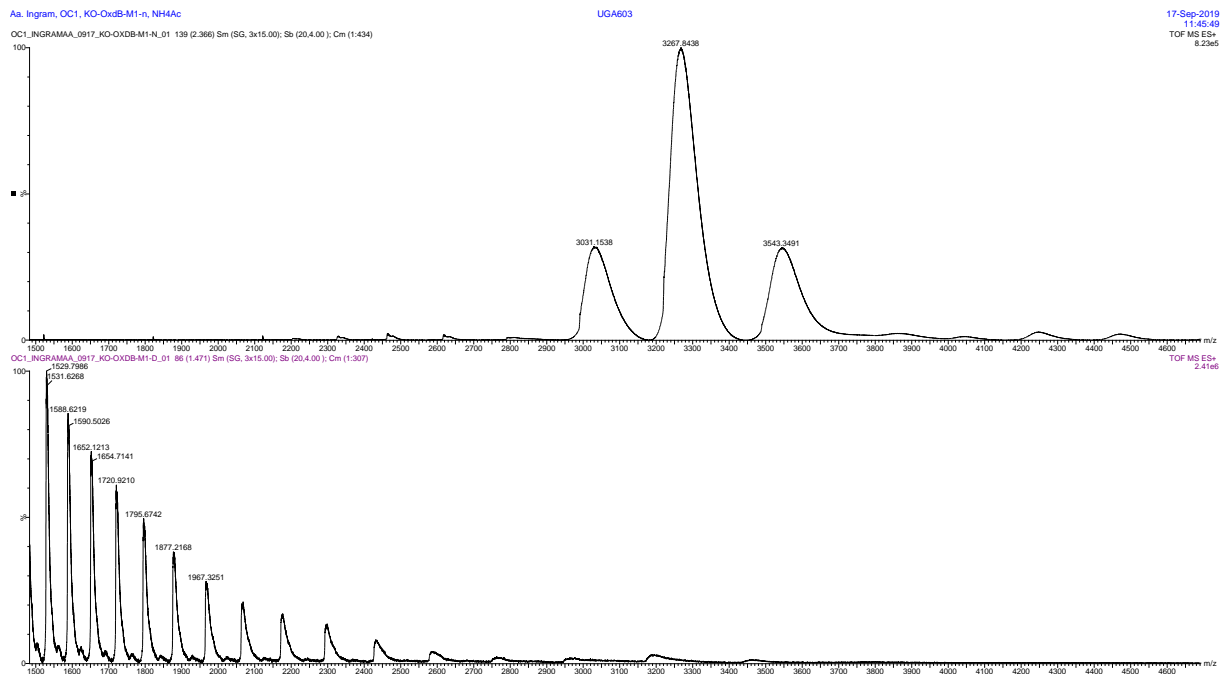

Figure S8. ESI-mass spectrum of native (upper) and denatured (lower) purified OxdB-M1.

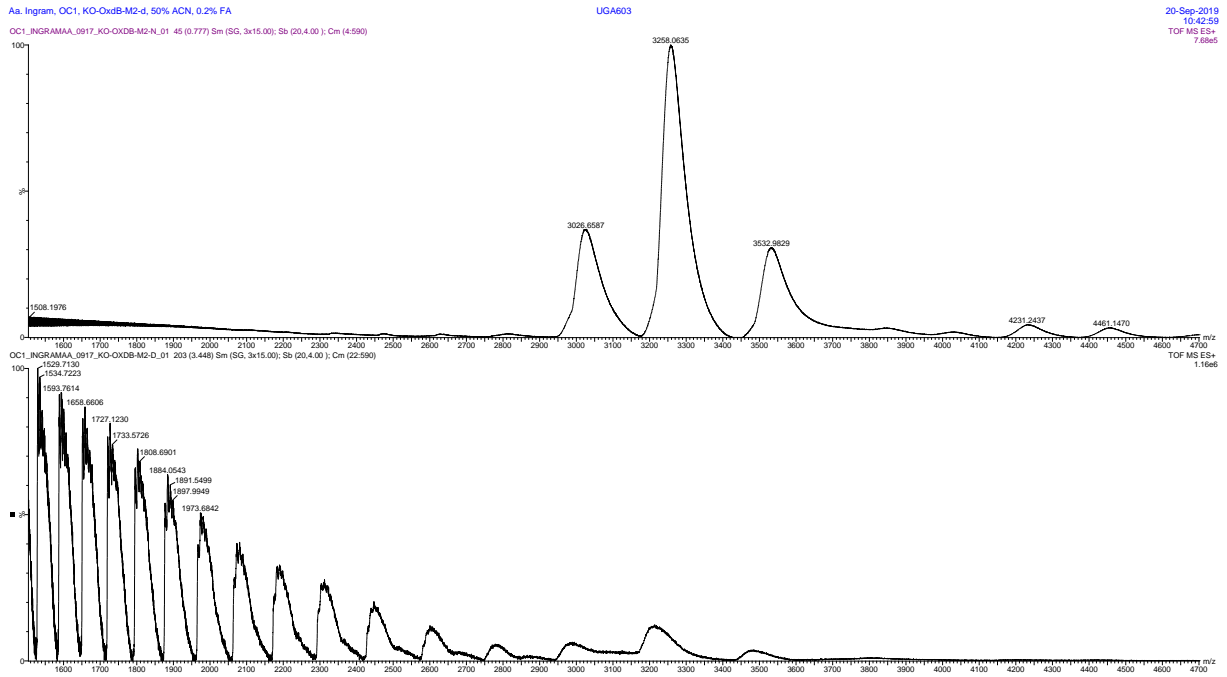

**Figure S9.** ESI-mass spectrum of native (upper) and denatured (lower) purified OxDb-M2.

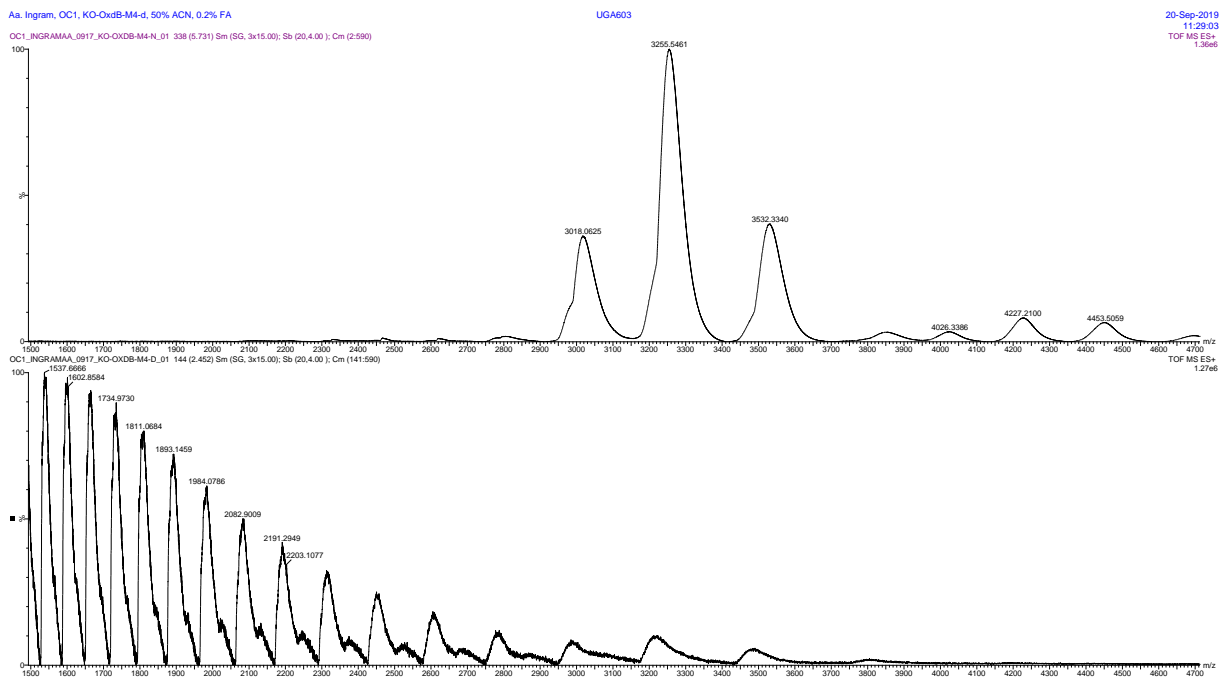

**Figure S10.** ESI-mass spectrum of native (upper) and denatured (lower) purified OxDb-M4.

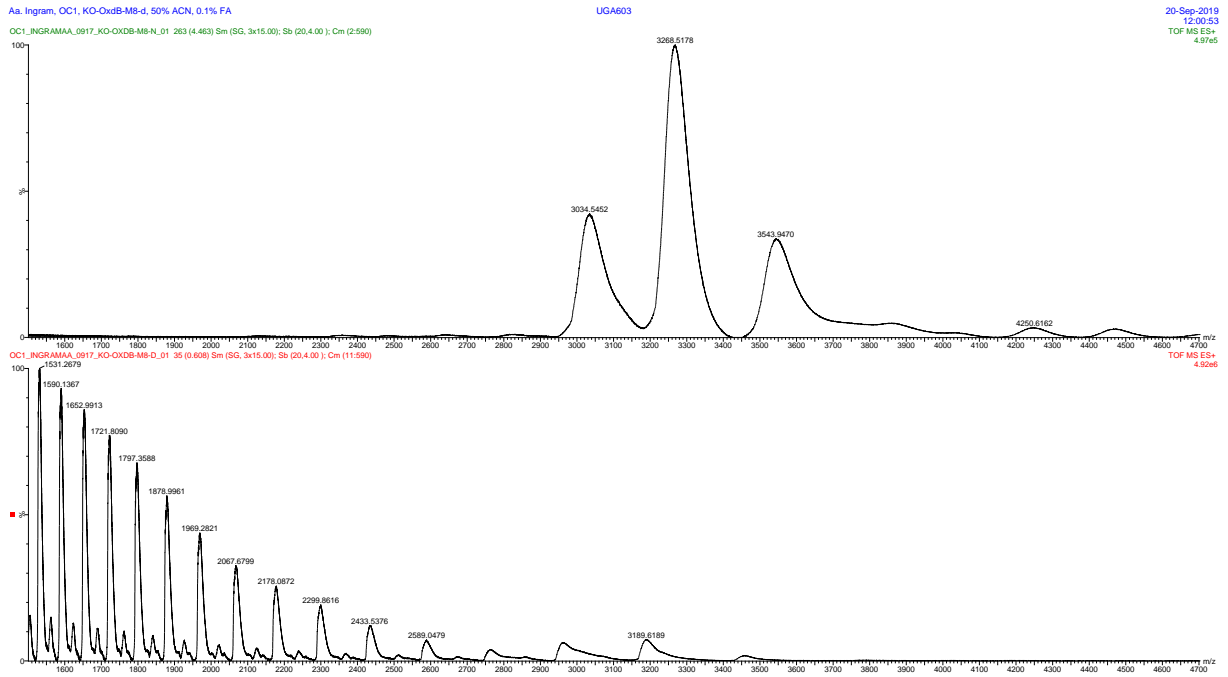

**Figure S11.** ESI-mass spectrum of native (upper) and denatured (lower) purified OxdB-M8.

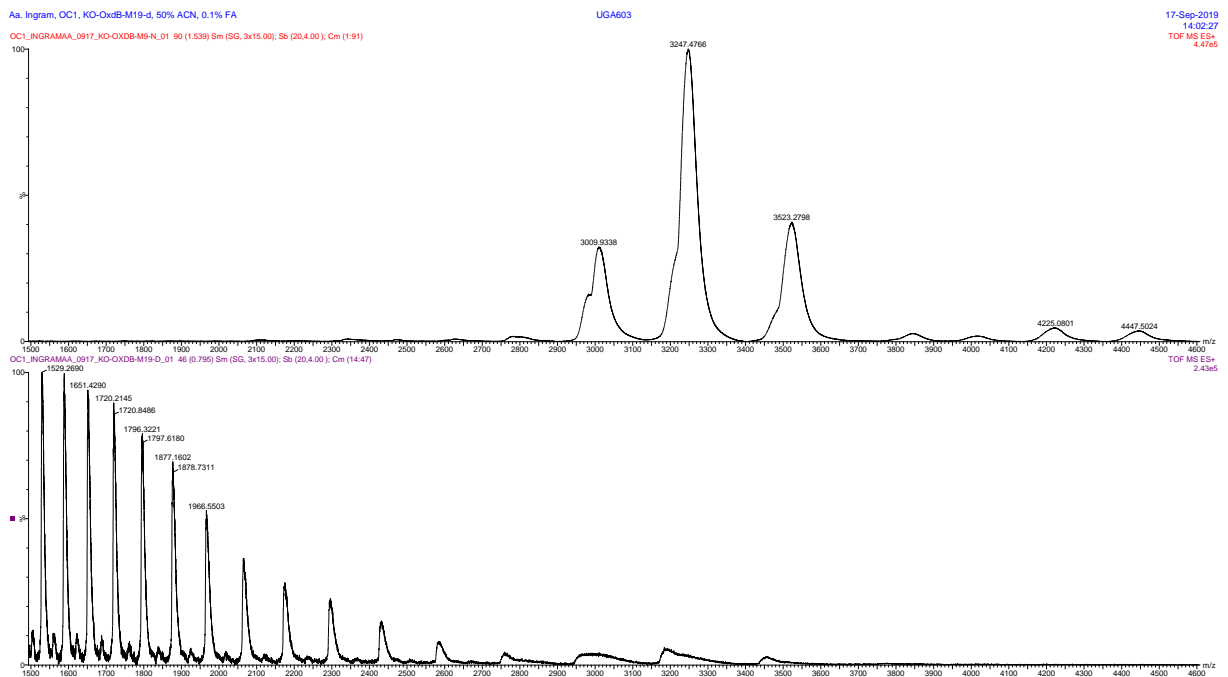

**Figure S12.** ESI-mass spectrum of native (upper) and denatured (lower) purified OxdB-M9.

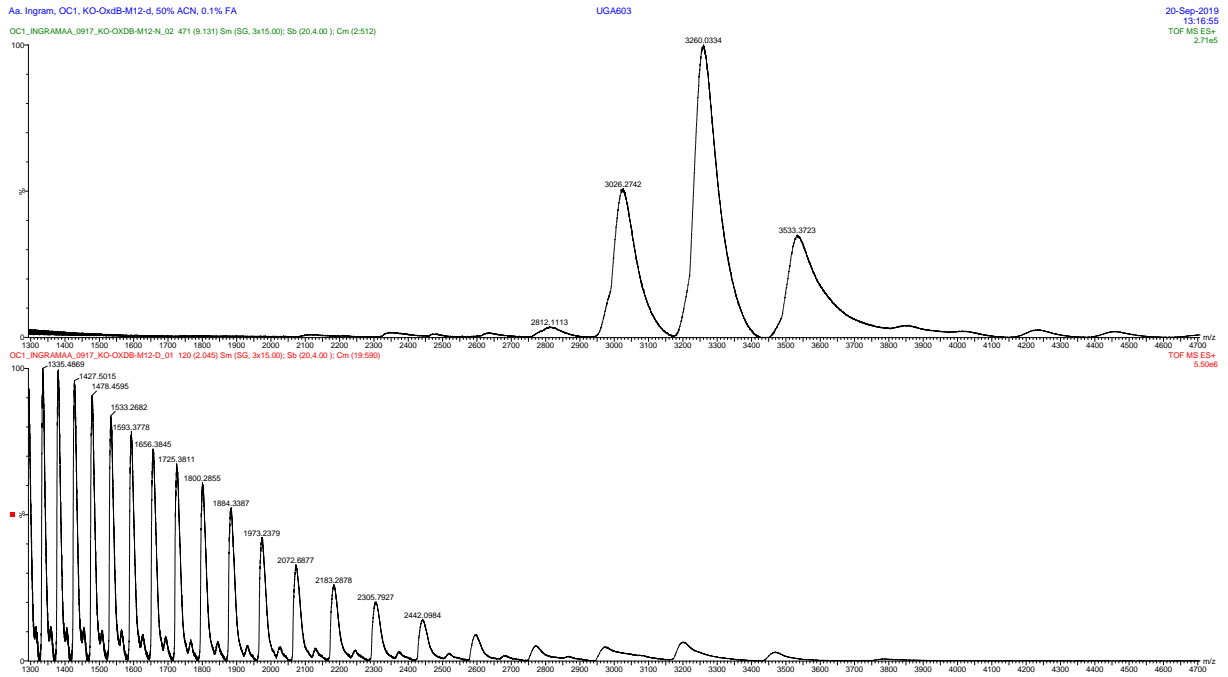

Figure S13. ESI-mass spectrum of native (upper) and denatured (lower) purified OxDb-M12.

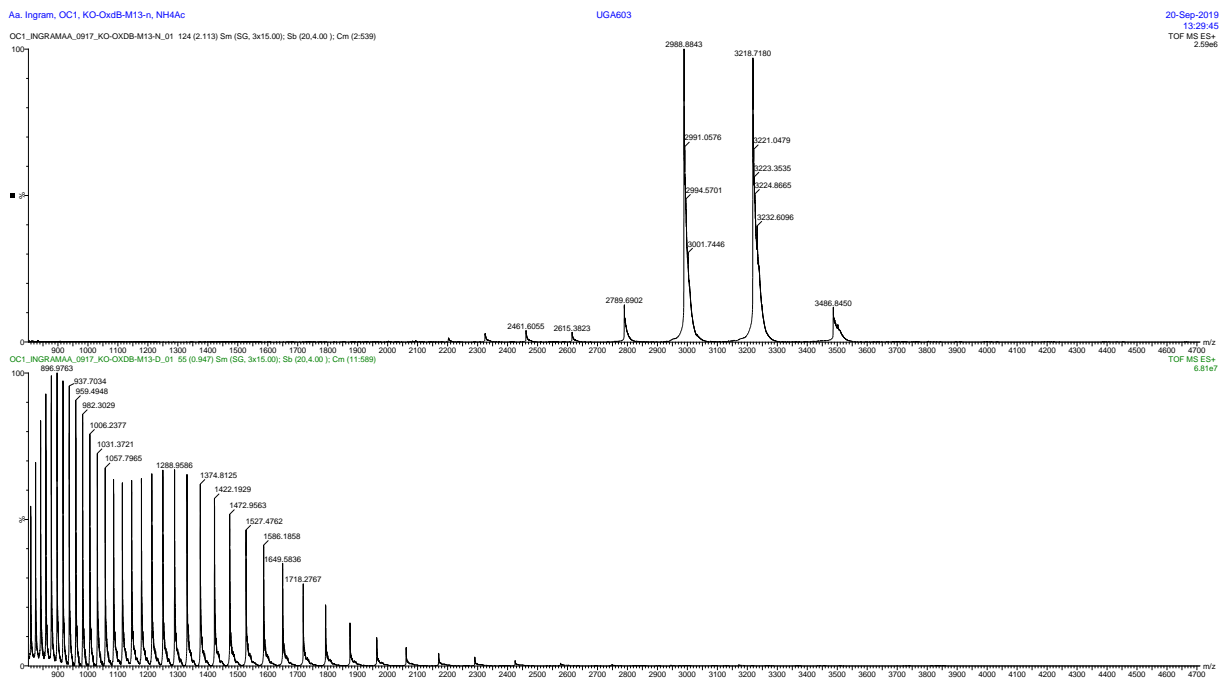

Figure S14. ESI-mass spectrum of native (upper) and denatured (lower) purified OxDb-M13.

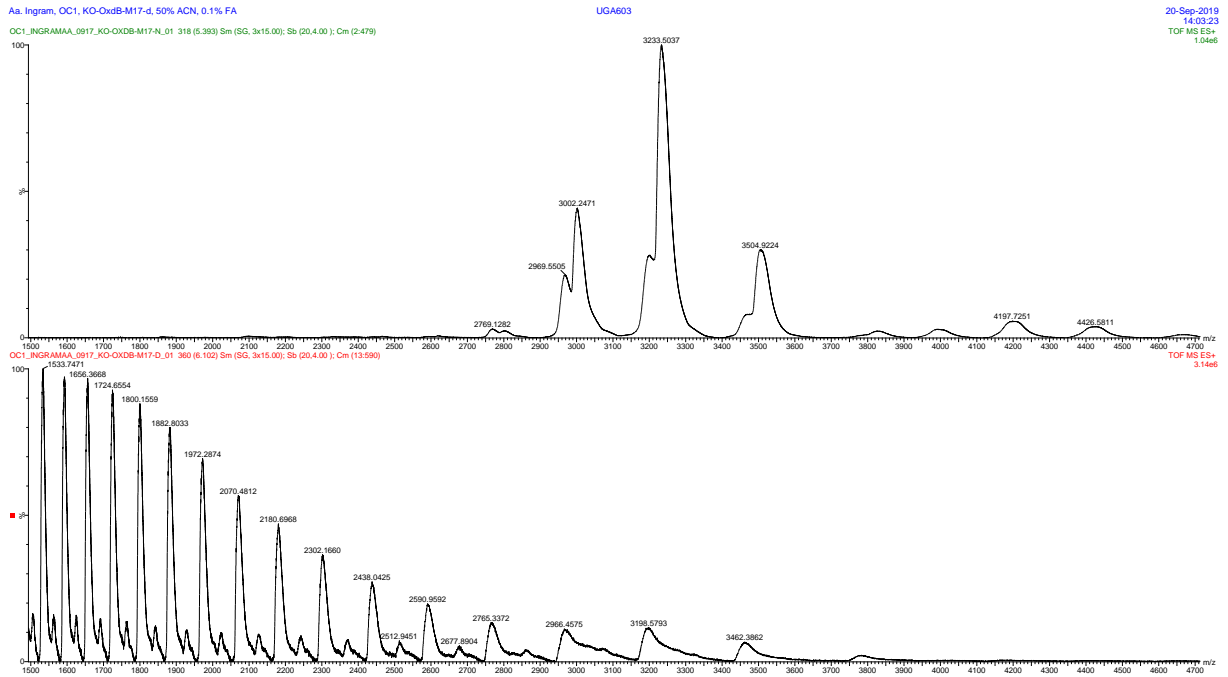

**Figure S15.** ESI-mass spectrum of native (upper) and denatured (lower) purified OxDb-M17.

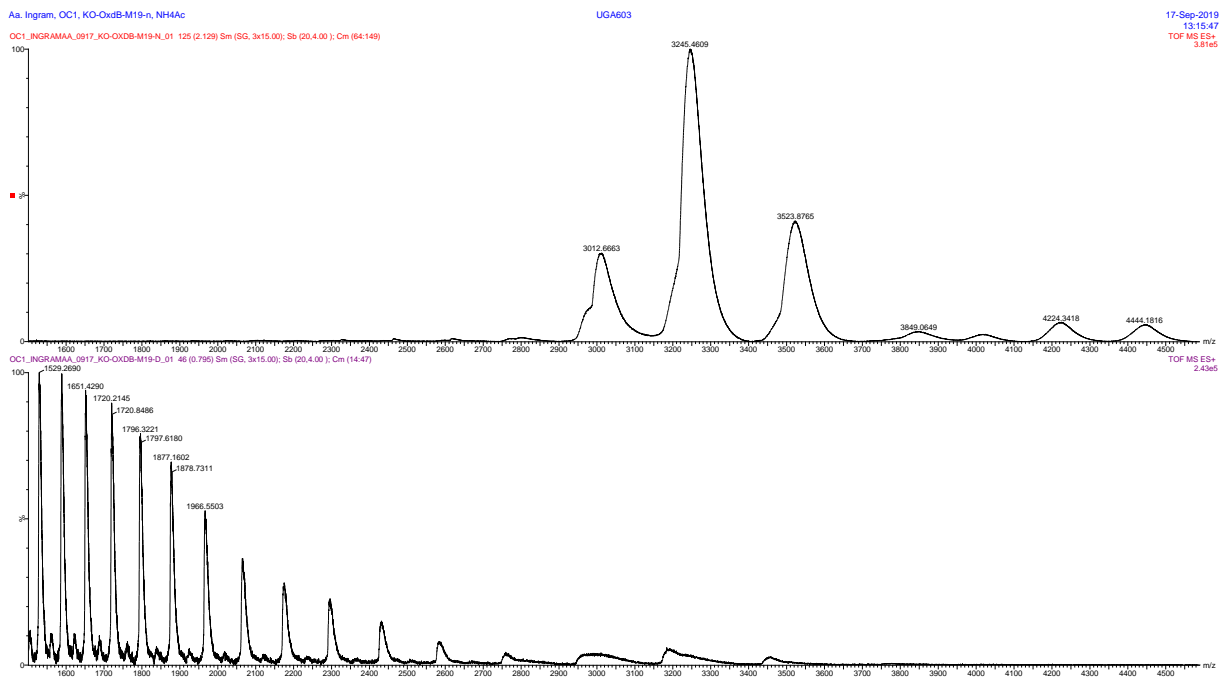

**Figure S16.** ESI-mass spectrum of native (upper) and denatured (lower) purified OxDb-M19.

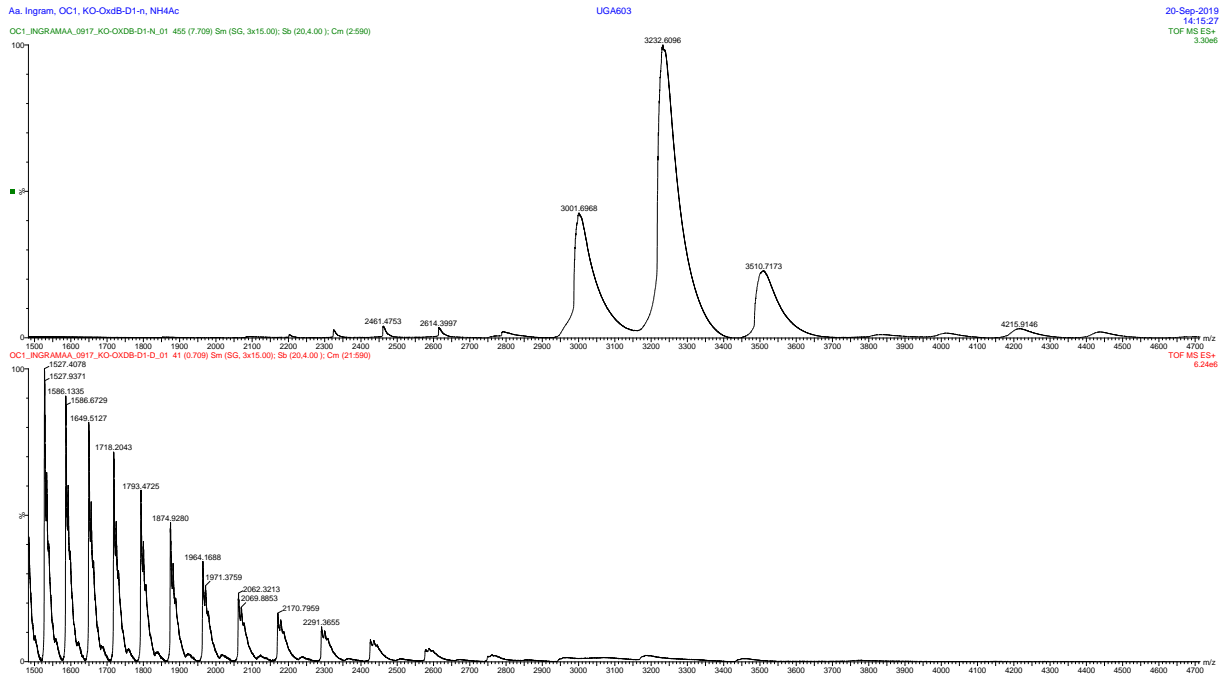

**Figure S17.** ESI-mass spectrum of native (upper) and denatured (lower) purified OxkB-D1.

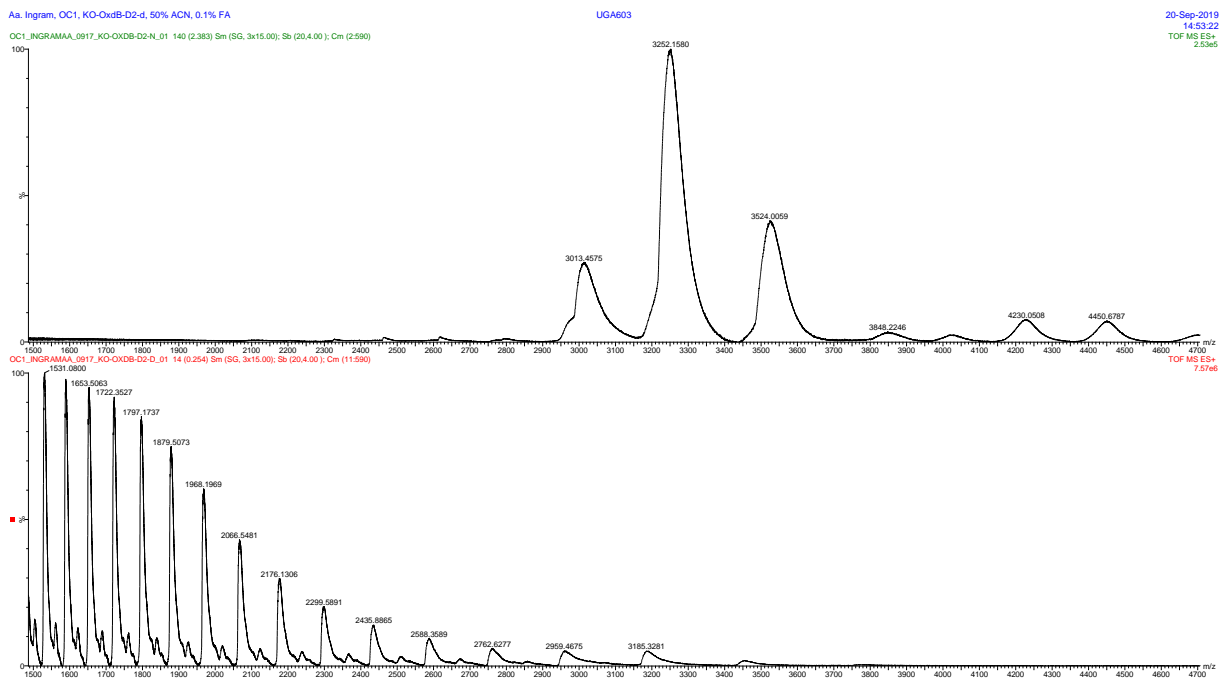

**Figure S18.** ESI-mass spectrum of native (upper) and denatured (lower) purified OxkB-D2.

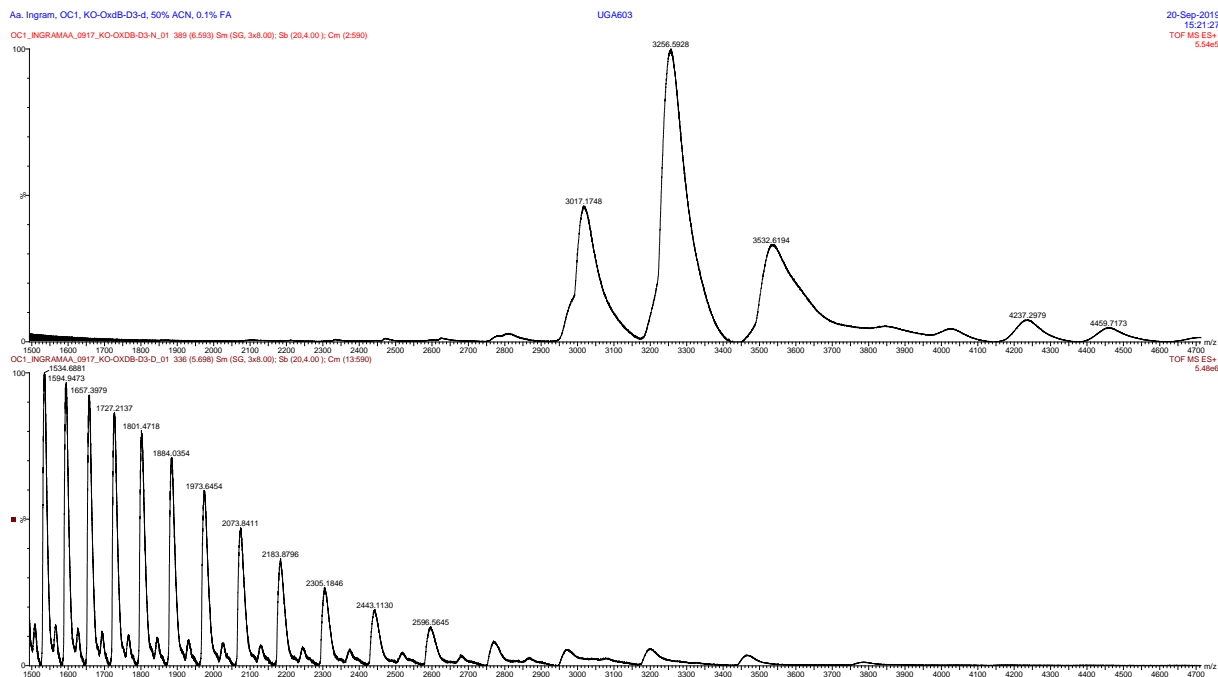

**Figure S19.** ESI-mass spectrum of native (upper) and denatured (lower) purified OxDb-D3.

Cofactor leaching was discussed as one reason for the incomplete incorporation of the heme cofactor into Oxds.[5] In our studies, we could find no evidence for cofactor leaching during the purification procedures, which would be visible due to its characteristic deep red colour. Cofactor incorporation up to 98 % was observed in the mass spectra. In addition, the time between activity assay and mass measurement was kept short (4 to 14 days), it was the same between the variants with the highest (OxDb-M1) and the lowest heme content (wild-type OxDb). Precipitation of small amount of heme is only relevant for long incubation times (~4 months).[5]



## 7. References

1. Matsui, D., Nakano, S., Dadashipour, M. & Asano, Y. Rational identification of aggregation hotspots based on secondary structure and amino acid hydrophobicity. *Sci. Rep.* **7**, 9558 (2017).
2. Miao, Y., Metzner, R. & Asano, Y. Kemp Elimination Catalyzed by Naturally Occurring Aldoxime Dehydratases. *ChemBioChem* **18**, 451–454 (2017).
3. Betke, T., Rommelmann, P., Oike, K., Asano, Y. & Gröger, H. Cyanide-Free and Broadly Applicable Enantioselective Synthetic Platform for Chiral Nitriles through a Biocatalytic Approach. *Angew. Chem. Int. Ed.* **56**, 12361–12366 (2017).
4. Laemmli, U. K. Cleavage of Structural Proteins during the Assembly of the Head of Bacteriophage T4. *Nature* **227**, 680–685 (1979).
5. Kato, Y., Nakamura, K., Sakiyama, H., Mayhew, S. G. & Asano, Y. Novel heme-containing lyase, phenylacetaldoxime dehydratase from *Bacillus* sp. strain OxB-1: purification, characterization, and molecular cloning of the gene. *Biochemistry* **39**, 800–809 (2000).
